# Supplementary material
Source: publisher figshare collection journal article supplement (https://geolsoc.figshare.com/ndownloader/files/30897750)
Supplement: Supplementary file 1 [file 30897750]

## Sheet: Table S2
			NAL-1A.csv	NAL-1B.csv	NAL-1B.csv	NAL-1B.csv	NAL-1B.csv	NAL-1c.csv	NAL-1c.csv	Nal-1d.csv	Nal-1d.csv	Nal-1d.csv	NAL-1E.csv	NAL-1E.csv	NAL-1E.csv	NAL-1E.csv	NAL-1E.csv	NAL-2A.csv	NAL-2A.csv	NAL-2B.csv	NAL-2B.csv	NAL-2B.csv	NAL-2B.csv	NAL-2B.csv	NAL-2c.csv	NAL-2f.csv	NAL-2G.csv	NAL-2G.csv	NAL-2G.csv	NAL-2H.csv	NAL-2H.csv	NAL-2H.csv	NAL-2H.csv	NAL-2I.csv	NAL-3A.csv	NAL-3A.csv	NAL-3A.csv	NAL-3B.csv	NAL-4C.csv	NAL-4C.csv	NAL-4C.csv	NAL-4C.csv	NAL-4C.csv	NAL-4D.csv	NAL-4D.csv	NAL-4E.csv	NAL-4E.csv	NAL-4E.csv	NAL-4E.csv
salinity			35.3	33.9	33.9	34.7	34.1	36.8	35.4	38.1	45	36.9	36.2	35.8	35.4	35.8	35.8	26.242	26.242	26.242	26.242	26.242	26.242	26.242	35.6	26.242	35.7	34.8	26.242	31.3	30.8	31.4	31.3	31.874	33.5965	30.6	31.1	38.9	42.1	35	38	38.8	37	36.1	38.1	6.28801	3.85224	0.701084	22.1595
Cl molality			6.03419	5.79487	5.79487	5.93162	5.82906	6.2906	6.05128	6.51282	7.69231	6.30769	6.18803	6.11966	6.05128	6.11966	6.11966	4.48581	4.48581	4.48581	4.48581	4.48581	4.48581	4.48581	6.08547	4.48581	6.10256	5.94872	4.48581	5.35043	5.26496	5.36752	5.35043	5.44855	5.74298	5.23077	5.31624	6.64957	7.19658	5.98291	6.49573	6.63248	6.32479	6.17094	6.51282	1.07487	0.658503	0.119843	3.78795
Raw data normalised to 1 ug/g Na
Na23	µg/g		1	1	1	1	1	1	1	1	1	1	1	1	1	1	1	1	1	1	1	1	1	1	1	1	1	1	1	1	1	1	1	1	1	1	1	1	1	1	1	1	1	1	1	1	1	1	1
Mg24	µg/g		0.0774903	1.03904	0.0849492	0.0368456	<0.017806	<0.003619	<0.0073132	0.0256164	0.522943	0.00893976	0.00208305	0.0219973	0.00201933	0.0144929	0.0962773	0.0565572	0.383908	0.525654	1.11563	0.000357935	0.0161824	0.00762748	0.486076	<1.6424	0.00092911	0.001357	0.00494643	1.89033	0.173638	1.7968	0.994323	0.356846	0.338523	0.226937	0.63871	0.0105724	0.319141	0.274419	1.72662	0.118512	0.00143033	0.0886336	0.124714	0.264004	0.248619	0.252715	0.789304
K39	µg/g		0.462723	0.250291	0.274969	0.380886	0.346661	0.361507	0.648573	0.150157	0.303711	0.166508	0.162691	0.346999	0.413938	0.354244	0.303392	0.965324	0.460391	0.545536	0.307009	0.0188172	0.4991	0.399412	0.0428808	0.253636	0.303052	0.248253	1.40919	0.299494	0.524008	0.381501	0.372848	0.556947	1.04462	1.39777	0.289577	0.41264	0.655372	0.920821	0.307684	0.0391049	0.171507	0.446427	0.233302	1.61554	0.843349	0.673517	0.288137
Ca40	µg/g		0.92715	0.282305	0.285593	0.245444	0.514101	0.218158	0.335478	0.337147	0.178481	0.472707	0.276157	0.543791	0.482198	0.389214	1.45281	4.29326	4.7988	2.56939	5.14104	0.0863207	4.16462	1.6693	0.107662	6.67234	0.749639	0.672963	5.87649	2.64054	3.3409	3.68435	2.05188	4.28748	2.57586	1.39351	2.99146	1.48352	1.3564	1.75814	2.88203	0.789993	1.80085	1.5861	0.440047	2.19789	2.99821	1.12382	1.19062
Mn55	µg/g		0.0768219	0.0699538	0.0950673	0.0616819	0.163288	0.0888203	0.0931735	0.0350667	0.0295005	0.079829	0.17026	0.141743	0.115293	0.0863794	0.132684	<0.092412	0.0396787	0.201147	0.204471	0.00312337	0.133951	0.172927	<0.0029478	0.0396778	0.109155	0.0897083	0.114525	0.0859774	0.0533632	0.0435042	0.0313628	<0.049958	0.056792	<0.025047	0.0315511	0.0313033	0.0426125	0.0101722	<0.024781	<0.0041318	0.0459119	0.0995234	0.00579424	0.064836	<0.014326	0.0218897	0.080237
Fe56	µg/g		0.298035	0.271048	0.206175	0.308019	0.67571	0.480107	0.407361	0.0874984	0.325366	0.150283	0.422295	0.420443	0.23157	0.168996	0.268301	0.334796	0.039903	0.114695	0.207238	0.00289628	0.248754	0.208194	0.0217059	0.0603663	0.180819	0.135113	0.126978	0.0659981	0.0542375	0.103209	0.0657872	<0.025468	0.159181	0.217728	0.412538	0.050258	0.492611	0.222604	0.104302	0.00744062	0.0644117	0.586404	0.0776256	0.393073	0.285441	0.128488	0.879185
Cu63	µg/g		<0.038865	<0.045836	<0.012199	<0.036123	<0.13541	<0.031346	<0.059187	<0.0053525	<0.055769	<0.0054016	<0.013601	<0.03689	<0.0064888	<0.013921	<0.021953	<0.29711	<0.033084	<0.07753	<0.035139	<0.002093	<0.048036	<0.030317	<0.0067474	<0.020658	<0.0053383	<0.00692	<0.011828	<0.018332	<0.014842	0.235172	<0.047337	<0.14279	<0.016016	0.0806347	<0.052935	<0.0025559	<0.032316	<0.016526	<0.0463	<0.0074225	<0.016111	<0.0076856	0.0160754	0.093083	<0.026617	<0.040755	<0.031255
Zn66	µg/g		0.0919595	0.0256661	0.0351742	0.0512854	0.0196748	0.0415371	0.0477261	0.0253043	0.036821	0.064796	0.0270537	0.0651747	0.0305306	0.0291155	0.032785	0.0918382	0.0116015	0.096262	0.047363	0.0011301	0.076282	0.0546829	0.0128423	0.0323518	0.029593	0.0211913	0.0514616	0.0654523	0.0370572	0.0524815	0.0425752	0.0412235	0.0182815	0.0434168	0.023502	0.0156811	0.0955449	0.0307282	0.0283557	0.0043217	0.00901934	0.0252797	0.0302051	0.124776	0.0465119	0.0668536	0.0225082
Sr88	µg/g		0.0253488	0.0159696	0.0204158	0.0136737	0.0195241	0.022188	0.0397744	0.013069	0.019109	0.0153176	0.0255858	0.0393406	0.0357058	0.0309982	0.038157	0.0238581	0.0734386	0.0490172	0.0559049	0.0014522	0.0606268	0.0320878	0.00538608	0.0701578	0.0289537	0.024926	0.0789075	0.0336656	0.0431685	0.0388489	0.027294	0.0698402	0.0126704	0.00733716	0.0289184	0.0148991	0.014638	0.00688669	0.0178691	0.00730965	0.00958258	0.0187939	0.00515173	0.0186629	0.0192191	0.0143138	0.00703514
Ag107	µg/g		<0.0018942	<0.0013194	0.000511976	0.00136853	<0.0042264	<0.0015957	<0.0032176	<0.00037487	<0.0037749	<0.00036519	<0.00080126	<0.0021042	<0.00037424	<0.0007952	<0.0012348	0.0263245	0.0433587	0.00508075	0.0141814	<8.6628e-005	0.057369	0.110774	0.671705	<0.00088477	<0.0002036	<0.00028283	<0.0004977	3.31663	<0.00053784	0.00472287	<0.0017758	<0.006001	<0.00071715	<0.0020198	<0.0021511	<0.00019487	0.00572127	0.000953024	<0.0015537	0.00172583	<0.00056829	<0.00025824	0.000934182	<0.0010615	<0.0014965	<0.0019725	<0.0016925
Ba137	µg/g		0.00878773	0.00742821	0.00695469	0.00645343	<0.01041	0.0103708	0.0112272	0.00497502	0.00667648	0.00458713	0.0112327	0.01224	0.0126373	0.0121934	0.015627	<0.015937	0.0075251	0.0128258	0.189215	<8.6921e-005	0.00979766	0.0133472	0.000349833	0.021883	0.0082885	0.00899072	0.0151411	0.00332024	0.00785599	0.00915556	<0.0024956	0.0212704	0.00647031	<0.0041929	0.00979886	0.0022464	0.00754068	0.005098	0.0224368	0.00408242	0.00513757	0.0301881	0.00173454	0.0128027	0.0117574	0.0134599	0.00537772
Pb208	µg/g		0.00637329	0.00279579	0.00342069	0.00238572	<0.0068973	0.00559341	0.0065041	0.00287269	0.00595744	0.00265567	0.00639503	0.00793494	0.00789726	0.00742474	0.00860589	0.0161588	0.00226175	0.02421	0.00769984	0.000189544	0.010418	0.0123479	0.00756038	<0.0013549	0.00610766	0.00401682	0.0100772	0.0067501	0.0042931	0.0119512	0.00630737	0.0102404	0.00355144	0.00787985	0.0101782	0.00294779	0.0194466	0.00809327	0.0067071	0.000553699	0.00172532	0.0186556	0.00592864	0.00742318	0.00857262	0.00730888	0.00382312
Reconstructed analyses
Na23	mg/kg		46289.4	35003.3	67093.8	68390.9	52848.8	71198.1	60452.7	88829.5	63968.1	72943.9	71900.4	56462.3	63994.2	71248.1	40700.9	14541	13458.9	17864.4	10565.6	92193	15554.1	28323.7	61570.8	11445.6	59452.3	63101.9	11527.7	13942	21344.5	13359.3	21717.4	17721.7	24229.6	28911.9	19507.4	49693.2	39361.8	31626.5	18755.2	70003.2	44198	36423.1	74079.4	4366.99	2627.07	800.083	17807
Mg24	mg/kg		3586.98	36369.8	5699.56	2519.9	0	0	0	2275.49	33451.7	652.101	149.772	1242.02	129.226	1032.59	3918.57	822.402	5166.96	9390.51	11787.4	32.9991	251.702	216.038	29928.1	0	55.2377	85.6295	57.0209	26355	3706.21	24004	21594.1	6323.92	8202.28	6561.17	12459.5	525.378	12562	8678.9	32383	8296.24	63.218	3228.31	9238.73	1152.9	653.139	202.193	14055.2
K39	mg/kg		21419.2	8761.02	18448.7	26049.1	18320.6	25738.6	39208	13338.3	19427.8	12145.7	11697.5	19592.4	26489.6	25239.2	12348.3	14036.8	6196.33	9745.68	3243.74	1734.82	7763.06	11312.8	2640.2	2903.02	18017.1	15665.2	16244.7	4175.56	11184.7	5096.58	8097.3	9870.05	25310.9	40412.2	5648.89	20505.4	25796.6	29122.3	5770.68	2737.47	7580.28	16260.3	17282.9	7055.04	2215.53	538.869	5130.87
Ca40	mg/kg		42917.3	9881.62	19161.5	16786.1	27169.6	15532.4	20280.6	29948.6	11417.1	34481.1	19855.8	30703.7	30857.9	27730.7	59130.4	62428.6	64586.4	45900.6	54318.3	7958.17	64776.9	47280.6	6628.83	76368.9	44567.8	42465.2	67742.3	36814.6	71309.7	49220.3	44561.5	75981.4	62412.1	40289	58355.5	73721	53390.1	55603.7	54053	55302.1	79594	57770.7	32598.4	9598.16	7876.49	899.15	21201.3
Mn55	mg/kg		3556.04	2448.62	6378.43	4218.48	8629.58	6323.84	5632.59	3114.96	1887.09	5823.04	12241.8	8003.13	7378.07	6154.37	5400.37	0	534.03	3593.38	2160.37	287.953	2083.49	4897.92	0	454.137	6489.53	5660.76	1320.21	1198.7	1139.01	581.186	681.12	0	1376.05	0	615.479	1555.56	1677.3	321.711	0	0	2029.21	3624.95	429.233	283.138	0	17.5136	1428.78
Fe56	mg/kg		13795.9	9487.6	13833	21065.7	35710.5	34182.7	24626.1	7772.44	20813	10962.2	30363.2	23739.2	14819.1	12040.7	10920.1	4868.29	537.048	2048.96	2189.6	267.017	3869.14	5896.81	1336.45	690.929	10750.1	8525.89	1463.76	920.147	1157.67	1378.79	1428.73	0	3856.89	6294.91	8047.52	2497.48	19390	7040.18	1956.21	520.867	2846.87	21358.6	5750.46	1716.55	749.874	102.801	15655.7
Cu63	mg/kg		0	0	0	0	0	0	0	0	0	0	0	0	0	0	0	0	0	0	0	0	0	0	0	0	0	0	0	0	0	2998.92	0	0	0	2225.33	0	0	0	0	0	0	0	0	1136.72	388.016	0	0	0
Zn66	mg/kg		12215	2578.01	6772.08	10064.9	2983.74	8486.36	8279.19	6450.11	6758.9	13562.9	5581.8	10559.7	5606.51	5952.69	3829.08	3832.08	448.063	4934.69	1435.99	298.973	3404.73	4444.44	2269	1062.56	5048.63	3837.22	1702.32	2618.59	2269.73	2011.9	2653.27	2096.36	1271.08	3602.05	1315.59	2236.1	10791.9	2788.71	1526.08	868.139	1143.91	2642.2	6420.86	1563.61	350.632	153.489	1150.14
Sr88	mg/kg		1173.38	558.989	1369.78	935.156	1031.83	1579.74	2404.47	1160.91	1222.37	1117.33	1839.63	2221.26	2284.96	2208.56	1553.02	346.922	988.4	875.663	590.671	133.883	942.996	908.842	331.625	802.998	1721.36	1572.87	909.621	469.367	921.41	518.993	592.756	1237.69	307	212.131	564.121	740.382	576.176	217.802	335.139	511.699	423.531	684.531	381.637	81.5007	50.49	11.4522	125.275
Ag107	mg/kg		0	0	34.3504	93.5954	0	0	0	0	0	0	0	0	0	0	0	382.786	583.559	90.7646	149.836	0	892.323	3137.52	41357.4	0	0	0	0	46240.6	0	63.0942	0	0	0	0	0	0	225.199	30.1408	0	120.814	0	0	69.2036	0	0	0	0
Ba137	mg/kg		406.779	260.012	466.617	441.356	0	738.384	678.716	441.929	427.082	334.603	807.636	691.098	808.712	868.758	636.034	0	101.279	229.125	1999.18	0	152.394	378.04	21.5395	250.464	492.771	567.331	174.542	46.2909	167.682	122.312	0	376.947	156.773	0	191.15	111.631	296.814	161.232	420.807	285.782	227.07	1099.54	128.493	55.9091	30.8874	10.769	95.7614
Pb208	mg/kg		295.016	97.8621	229.507	163.161	0	398.24	393.19	255.18	381.086	193.715	459.805	448.025	505.379	528.998	350.267	234.966	30.4406	432.497	81.3537	17.4746	162.043	349.737	465.499	0	363.114	253.469	116.167	94.1101	91.6341	159.66	136.98	181.477	86.0501	227.821	198.55	146.485	765.452	255.962	125.793	38.7607	76.2556	679.493	439.19	32.4169	22.5209	5.84771	68.0784
Table S2: Full LA-ICPMS data set for the extended element list analyses. Salinities determined from microthermometric analyses, and used to calculate chlorinity. Concentrations reconstructed using the method of Allan et al., (2005).
[truncated: 32 more columns]
